# Supplementary material for: Effects of Crystal Lime Sulfur Fumigation and Application of Root-Growth-Promoting Agents on the Control of Apple Replant Disease
Source: MDPI journal article supplement (doi:10.3390/horticulturae9080901), 2023-08-08
Supplement: s1 [file s1]

Archive with 1 entries (1 files):
- horticulturae-2454485-supplementary.pdf
